# Supplementary material for: Levels of Oxidized LDL and Advanced Glycation End Products–Modified LDL in Circulating Immune Complexes Are Strongly Associated With Increased Levels of Carotid Intima-Media Thickness and Its Progression in Type 1 Diabetes
Source: PubMed Central journal article supplement — Diabetes. 2011 Jan 21;60(2):582–9. doi: 10.2337/db10-0915 (PMC3028359; doi:10.2337/db10-0915), 2011-01-21
Supplement: supp_db10-0915_DB100915SupplementaryData.pdf [file supp_db10-0915_DB100915SupplementaryData.pdf]

## ONLINE APPENDIX- Supplementary material

### EDIC participants

Study Chairmen: S. Genuth, D. Nathan

Albert Einstein College of Medicine: H. Shamoon, H. Duffy, S. Engel, H. Engel

Case Western Reserve University: W. Dahms, L. Mayer, S. Pendegras, H. Zegarra, D. Miller, L. Singerman

Cornell University Medical Center: D. Brillion, M. Lackaye, M. Heinemann, F. Rahhal, V. Reppuci, T. Lee

Henry Ford Health System: F. Whitehouse, D. Kruger, J.D. Carey

International Diabetes Center: R. Bergenstal, M. Johnson, D. Kendall, M. Spencer, D. Noller, K. Morgan, D. Etzwiler (past)

Joslin Diabetes Center: A. Jacobson, E. Golden, D. Soroko, G. Sharuk, P. Arrigg, J. Doyle (past)

Massachusetts General Hospital: D. Nathan, S. Fritz, J. Godine, C. McKittrick, P. Lou

Mayo Foundation: J. Service, G. Ziegler, J. Pach

Medical University of South Carolina: J. Colwell, D. Wood, R. Mayfield, K. Hermayer, M. Szpiech, T. Lyons, J. Parker, A. Farr, S. Elsing, T. Thompson

Northwestern University: M. Molitch, B. Schaefer, L. Jampol, D. Weinberg, A. Lyon,

University of California, San Diego: O. Kolterman, G. Lorenzi, M. Goldbaum

University of Iowa: W. Sivitz, M. Bayless, R. Zeither (past), T. Weingeist, E. Stone, H. Culver Boidt, K. Gehries, S. Russell

University of Maryland School of Medicine: D. Counts, A. Kowarski (past), D. Ostrowski, T. Donner, S. Steidl, B. Jones

University of Michigan: W. Herman, D. Greene (past), C. Martin, M. J. Stevens, A. K. Vine, S. Elnor

University of Minnesota: J. Bantle, B. Rogness, T. Olsen, E. Steuer, S. Kaushel

University of Missouri: D. Goldstein, S. Hitt, J. Giangiacomo, L.D. Ormerod

University of New Mexico: D. Schade, J. Canady, M. Schluster, A. Das, D. Hornbeck (past)

University of Pennsylvania: S. Schwartz, B.J. Maschak-Carey, L. Baker, (deceased), S. Braunstein

University of Pittsburgh: T. Orchard, N. Silvers, T. Songer, B. Doft, S. Olson, R.L. Bergren, M. Fineman

University of South Florida: J. Malone, H. Wetz, C. Berger, R. Gstalder, P. R. Pavan

University of Tennessee: M. Bryer-Ash, A. Kitabchi, H. Lambeth, M.B. Murphy, S. Moser, D. Meyer

University of Texas Southwestern University Medical Center: P. Raskin, S. Strowig, A. Edwards, J. Alappatt, C. Wilson (past), S. Park (past)

University of Toronto: B. Zinman, A. Barnie, S. MacLean, R. Devenyi, M. Mandelcorn, M. Brent

University of Washington: J. Palmer, S. Catton, J. Kinyoun, L. Van Ottingham (past)

University of Western Ontario: J. Dupre, J. Harth, C. Canny (past) D. Nicolle

Vanderbilt University: M. May, R. Lorenz (past), J. Lipps, L. Survant, S. Feman (past),. Tawansy

Washington University, St. Louis: N. White, J. Santiago (deceased), L. Levandoski, I. Boniuk, G. Grand, M. Thomas, D. Burgess, D. Joseph, K. Blinder

Yale University School of Medicine: W. Tamborlane, P. Gatcomb, K. Stroessel

Clinical Coordinating Center (Case Western Reserve University): B. Dahms, R. Trail, J. Quin  
Data Coordinating Center (The George Washington University, Biostatistics Center): J. Lachin,  
P. Cleary, D. Kenny, J. Backlund, L. Diminick, A. Henry, K. Klump, D. Lamas  
National Institute of Diabetes and Digestive and Kidney Disease Program Office: C. Cowie, R.  
Eastman (past), J. Fradkin  
Central Fundus Photograph Reading Center (University of Wisconsin): M. Davis, L. Hubbard, P.  
Geithman, J. Brickbauer, L. Kastorff, M. Neider, D. Badal, B. Esser, K. Miner, H. Wabers  
Central Biochemistry Laboratory (University of Minnesota): M. Steffes, J. Bucksa, B. Chavers  
Central Carotid Ultrasound Unit (New England Medical Center): D. O'Leary, I. Funk  
Central ECG Reading Unit (University of Minnesota): R. Crow, C. O'Donnell (past), B. Gloeb,  
S. Thomas  
External Advisory Committee: G. Weir (Chairman), C. Clark, R. D'Agostino, M. Espeland, B.  
Klein, H. Jacobson, T. Manolio, L. Rand, D. Singer, M. Stern  
Molecular Risk Factors Program Project (Medical University of South Carolina): M. Lopes-  
Virella, W.T. Garvey, T.J. Lyons, A. Jenkins, R. Klein, G. Virella, A.A. Jaffa, D. Zheng, D.  
Lackland, R.K. Mayfield  
Genetic Studies Group (Hospital for Sick Children): A. Boright, A. Paterson, S. Scherer, B.  
Zinman  
Lipoprotein Distribution Group (University of Washington): J. Brunzell, J. Hokanson, S.  
Marcovina, J. Purnell, S. Sibley  
Editor, EDIC Publications: D. Nathan
